# Supplementary material
Source: MDPI journal article supplement (https://www.mdpi.com/2075-163X/9/11/652)
Supplement: s1 [file s1]

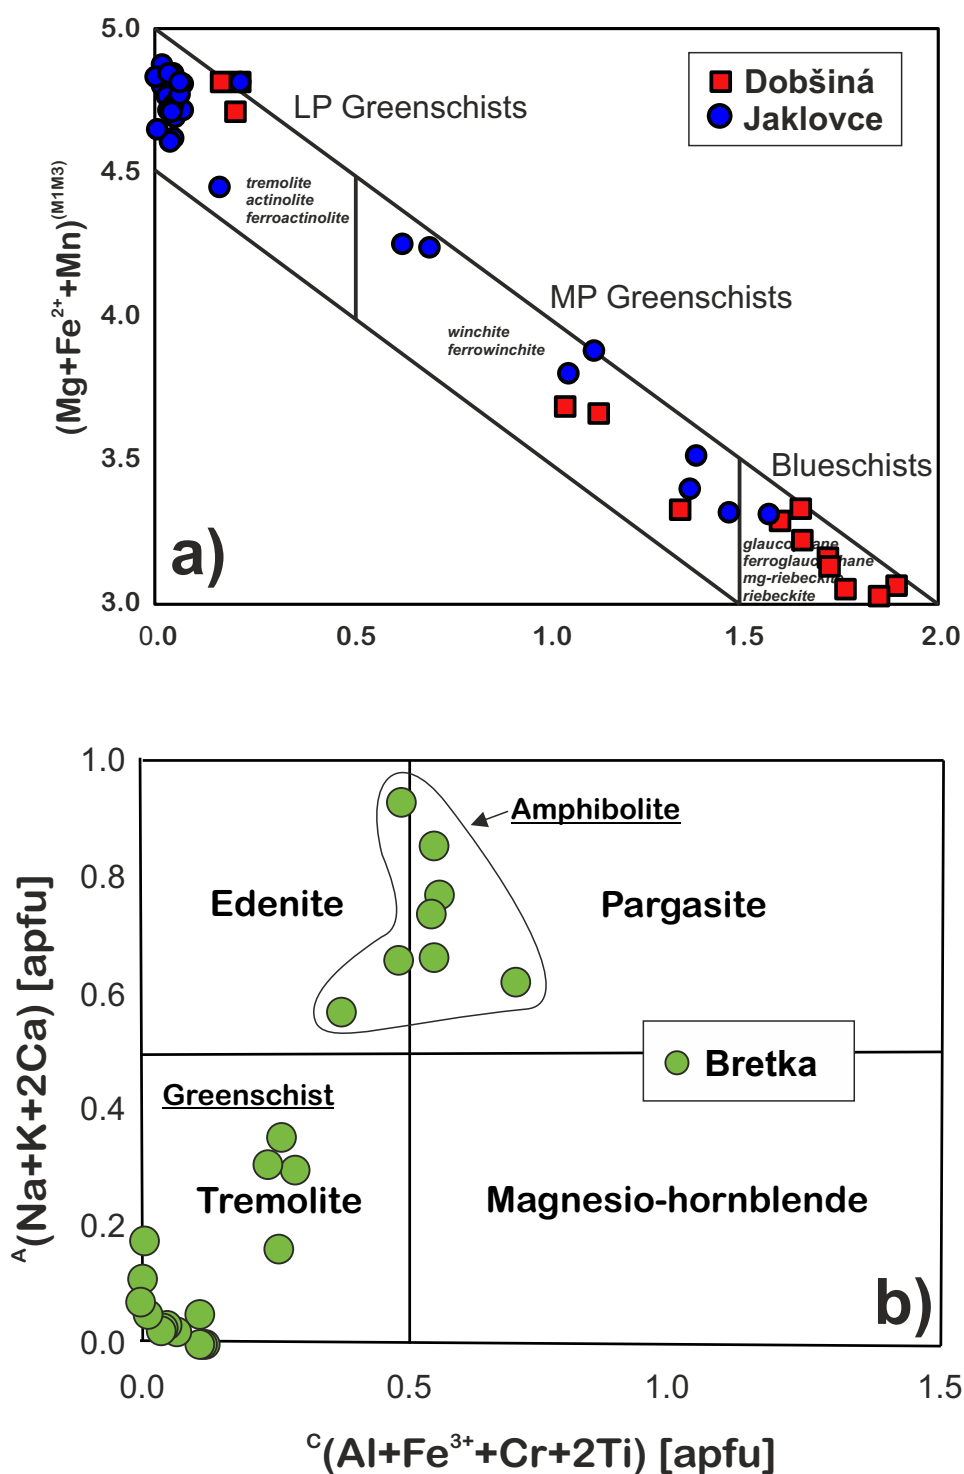

Figure S1: (a) Diagram of amphiboles composition in the glaucophane/riebeckite-tremolite/actinolite-tschermakite ternary system after [136] for Dobšiná and Jaklovce metabasalts. (b) Classification diagram of amphiboles after [137] from Bretka metabasalts. Analyses in Table S1.
