# Supplementary material
Source: MDPI journal article supplement (https://www.mdpi.com/2075-163X/9/11/652)
Supplement: s1 [file s1]

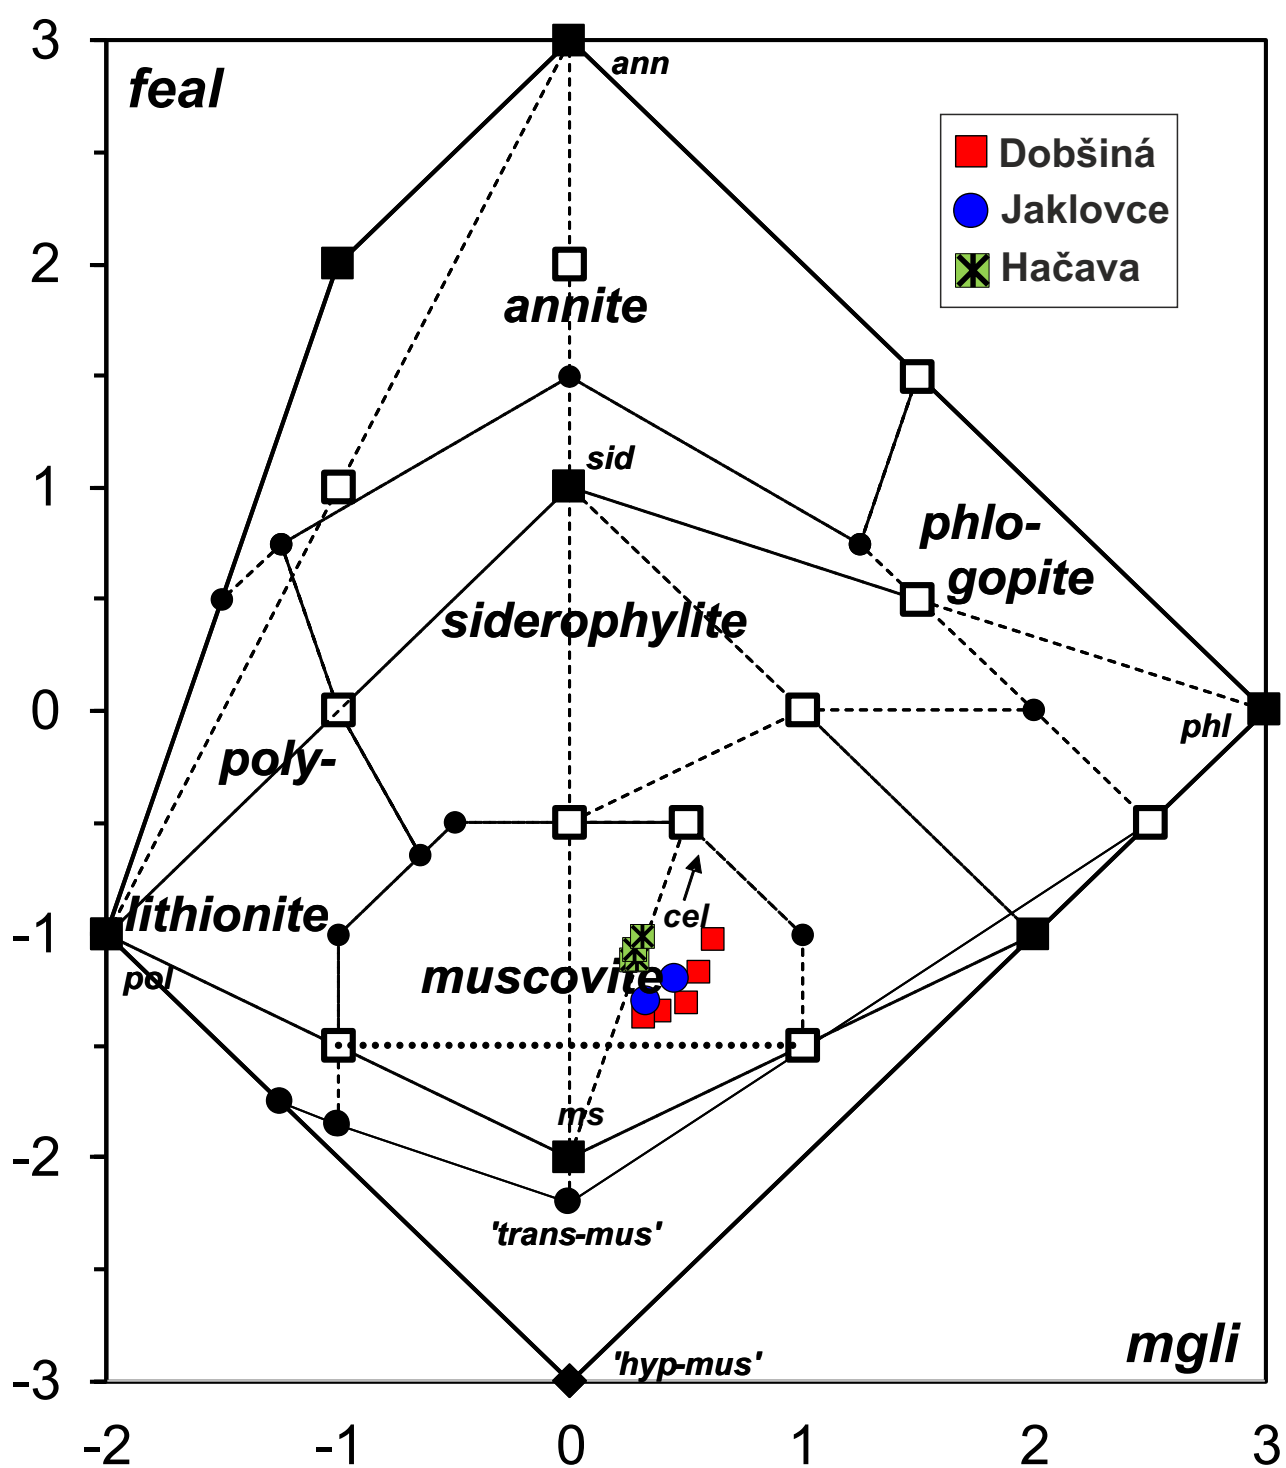

Figure S2: Classification diagram of white mica after [138] from Dobšiná, Jaklovce and Hačava metabasalts. Analyses in Table S1.
