# Supplementary material
Source: MDPI journal article supplement (https://www.mdpi.com/2075-163X/9/11/652)
Supplement: s1 [file s1]

**Table S2:** Additional set of zircon U–Pb isotopic data for age calculation diagrams.

| Sample/Spot<br>Zircon | U<br>(ppm) | Th/U  | f206<br>(%) | 207Pb/235U | $\pm\sigma$<br>(%) | 206Pb/238U | $\pm\sigma$<br>(%) | q    | 207Pb/235U<br>age (Ma) | $\pm\sigma$<br>(Ma) | 206Pb/238U<br>age (Ma) | $\pm\sigma$<br>(Ma) |
|-----------------------|------------|-------|-------------|------------|--------------------|------------|--------------------|------|------------------------|---------------------|------------------------|---------------------|
| DOL-1/12              | 2049.4     | 1.166 | 0.11        | 0.3728     | 1.95               | 0.0510     | 1.50               | 0.77 | 321.7                  | 5.4                 | 320.7                  | 4.7                 |
| DOL-1/16              | 749.1      | 0.737 | 0.04        | 0.3873     | 2.17               | 0.0524     | 1.51               | 0.69 | 332.4                  | 6.2                 | 329.2                  | 4.8                 |
| DOL-1/18              | 1466.5     | 0.235 | 0.07        | 0.3871     | 1.77               | 0.0530     | 1.50               | 0.85 | 332.2                  | 5.0                 | 333.2                  | 4.9                 |
| DOL-1/22              | 391.9      | 0.375 | 0.01        | 0.4360     | 2.21               | 0.0582     | 1.50               | 0.68 | 367.4                  | 6.8                 | 364.7                  | 5.3                 |
| DOL-1/27              | 620.4      | 0.496 | 0.13        | 0.4601     | 2.30               | 0.0604     | 1.54               | 0.67 | 384.4                  | 7.4                 | 378.1                  | 5.6                 |
| DOL-1/11              | 486.9      | 0.434 | 0.15        | 0.5075     | 1.96               | 0.0664     | 1.55               | 0.79 | 416.8                  | 6.7                 | 414.2                  | 6.2                 |
| DOL-1/07              | 605.3      | 0.296 | 0.13        | 0.5459     | 1.82               | 0.0691     | 1.56               | 0.86 | 442.3                  | 6.6                 | 430.8                  | 6.5                 |
| DOL-1/19              | 452.0      | 0.312 | 0.05        | 0.5388     | 2.08               | 0.0700     | 1.52               | 0.73 | 437.6                  | 7.4                 | 436.0                  | 6.4                 |
| DOL-1/17              | 1223.0     | 0.650 | 0.00        | 0.5419     | 1.75               | 0.0721     | 1.53               | 0.88 | 439.7                  | 6.3                 | 448.8                  | 6.7                 |
| DOL-1/04              | 1207.7     | 0.382 | 0.01        | 0.6378     | 1.58               | 0.0802     | 1.50               | 0.95 | 501.0                  | 6.3                 | 497.2                  | 7.2                 |
| DOL-1/30              | 917.7      | 0.267 | 1.45        | 0.6581     | 2.88               | 0.0840     | 1.50               | 0.52 | 513.4                  | 11.7                | 519.8                  | 7.5                 |
| DOL-1/08              | 531.3      | 0.374 | 0.10        | 0.6838     | 2.02               | 0.0844     | 1.55               | 0.77 | 529.1                  | 8.3                 | 522.3                  | 7.8                 |
| DOL-1/25              | 791.7      | 0.375 | 0.08        | 0.6940     | 1.81               | 0.0860     | 1.51               | 0.83 | 535.2                  | 7.5                 | 531.8                  | 7.7                 |
| DOL-1/28              | 192.8      | 0.933 | 0.24        | 0.6952     | 2.93               | 0.0860     | 1.50               | 0.51 | 535.9                  | 12.3                | 532.0                  | 7.7                 |
| DOL-1/13              | 1210.1     | 0.104 | 0.61        | 0.7347     | 1.91               | 0.0908     | 1.52               | 0.79 | 559.3                  | 8.2                 | 560.4                  | 8.2                 |
| DOL-1/15              | 801.7      | 0.139 | 0.00        | 0.7405     | 1.71               | 0.0921     | 1.52               | 0.89 | 562.7                  | 7.4                 | 568.1                  | 8.3                 |
| DOL-1/23              | 706.4      | 0.128 | 0.15        | 0.7660     | 1.78               | 0.0962     | 1.50               | 0.84 | 577.5                  | 7.9                 | 592.4                  | 8.5                 |
| DOL-1/20              | 439.8      | 0.433 | 0.01        | 0.8158     | 2.27               | 0.0971     | 1.50               | 0.66 | 605.7                  | 10.4                | 597.2                  | 8.6                 |
| DOL-1/32              | 1487.1     | 0.120 | 1.98        | 0.9198     | 4.96               | 0.1090     | 1.52               | 0.31 | 662.3                  | 24.4                | 666.8                  | 9.6                 |
| JAK-1/07              | 1438.2     | 0.072 | 0.06        | 0.4455     | 2.01               | 0.0594     | 1.97               | 0.98 | 374.1                  | 6.3                 | 371.8                  | 7.1                 |
| JAK-1/10              | 999.4      | 0.085 | 0.05        | 0.6643     | 1.57               | 0.0851     | 1.50               | 0.95 | 517.2                  | 6.4                 | 526.6                  | 7.6                 |
| JAK-1/24              | 332.5      | 0.701 | 0.05        | 0.9477     | 1.61               | 0.1100     | 1.50               | 0.93 | 676.9                  | 8.0                 | 672.5                  | 9.6                 |
| JAK-1/11              | 391.6      | 1.203 | 0.12        | 0.9436     | 1.63               | 0.1121     | 1.54               | 0.94 | 674.8                  | 8.1                 | 684.7                  | 10.0                |
| JAK-1/09              | 495.1      | 0.043 | 0.08        | 0.5633     | 1.64               | 0.0734     | 1.54               | 0.94 | 453.7                  | 6.0                 | 456.7                  | 6.8                 |
| JAK-1/15              | 290.6      | 0.742 | 0.10        | 0.8367     | 1.80               | 0.0999     | 1.66               | 0.92 | 617.3                  | 8.3                 | 614.0                  | 9.7                 |
| JAK-1/04              | 307.5      | 0.107 | 0.17        | 0.5658     | 1.69               | 0.0729     | 1.53               | 0.91 | 455.3                  | 6.2                 | 453.4                  | 6.7                 |
| JAK-1/01              | 292.8      | 0.117 | 0.09        | 0.5696     | 1.97               | 0.0736     | 1.81               | 0.92 | 457.7                  | 7.3                 | 457.8                  | 8.0                 |
| JAK-1/18              | 521.7      | 0.335 | 0.11        | 0.3378     | 1.72               | 0.0472     | 1.51               | 0.88 | 295.5                  | 4.4                 | 297.5                  | 4.4                 |
| JAK-1/14              | 320.3      | 0.711 | 0.22        | 0.7867     | 1.67               | 0.0948     | 1.51               | 0.91 | 589.3                  | 7.5                 | 583.6                  | 8.4                 |
| JAK-1/22              | 524.5      | 0.380 | 0.21        | 0.3397     | 1.68               | 0.0472     | 1.52               | 0.91 | 296.9                  | 4.3                 | 297.5                  | 4.4                 |
| JAK-1/19              | 1241.4     | 0.506 | 0.07        | 0.3616     | 2.05               | 0.0504     | 1.91               | 0.93 | 313.4                  | 5.5                 | 316.8                  | 5.9                 |
| JAK-1/12              | 353.6      | 0.451 | 0.21        | 1.2652     | 1.82               | 0.1365     | 1.61               | 0.89 | 830.2                  | 10.4                | 825.1                  | 12.5                |
| JAK-1/23              | 293.1      | 0.779 | 0.80        | 0.2558     | 2.81               | 0.0379     | 1.50               | 0.53 | 231.3                  | 5.8                 | 239.8                  | 3.5                 |
| JAK-1/13              | 119.4      | 0.346 | 2.05        | 1.2137     | 7.97               | 0.1335     | 1.53               | 0.19 | 806.9                  | 45.4                | 808.0                  | 11.7                |
| JAK-1/26              | 426.6      | 0.182 | 4.76        | 0.8465     | 10.18              | 0.1054     | 1.66               | 0.16 | 622.7                  | 48.5                | 645.8                  | 10.2                |
| JAK-5A/03             | 152.5      | 0.789 | 0.16        | 0.7526     | 3.07               | 0.0906     | 1.50               | 0.49 | 569.7                  | 13.5                | 559.1                  | 8.0                 |
| JAK-5A/04             | 674.4      | 0.323 | 0.08        | 0.6057     | 2.66               | 0.0781     | 1.61               | 0.60 | 480.8                  | 10.2                | 484.8                  | 7.5                 |
| JAK-5A/05             | 438.6      | 1.586 | 0.16        | 0.7805     | 2.11               | 0.0952     | 1.50               | 0.71 | 585.7                  | 9.4                 | 586.4                  | 8.4                 |
| JAK-5A/09             | 872.1      | 0.214 | 0.35        | 0.5828     | 2.27               | 0.0759     | 1.51               | 0.66 | 466.2                  | 8.5                 | 471.8                  | 6.9                 |
| JAK-5A/12             | 151.8      | 0.380 | 0.26        | 0.7680     | 3.00               | 0.0916     | 1.60               | 0.53 | 578.6                  | 13.3                | 564.9                  | 8.7                 |
| JAK-5A/13             | 744.4      | 0.871 | 0.25        | 0.4734     | 2.87               | 0.0620     | 2.08               | 0.72 | 393.6                  | 9.4                 | 387.8                  | 7.8                 |
| JAK-5A/15             | 500.4      | 0.321 | 0.07        | 3.4782     | 2.10               | 0.2336     | 1.57               | 0.75 | 1522.3                 | 16.7                | 1353.4                 | 19.2                |
| JAK-5A/16             | 651.0      | 0.204 | 0.25        | 0.5496     | 2.17               | 0.0731     | 1.51               | 0.70 | 444.8                  | 7.8                 | 454.9                  | 6.6                 |
| JAK-5A/17             | 1140.1     | 0.447 | 0.17        | 0.6670     | 2.16               | 0.0825     | 1.50               | 0.69 | 518.9                  | 8.8                 | 511.3                  | 7.4                 |
| JAK-5A/19             | 688.7      | 0.444 | 0.19        | 0.5727     | 2.09               | 0.0751     | 1.50               | 0.72 | 459.8                  | 7.7                 | 466.6                  | 6.8                 |
| JAK-5A/20             | 239.1      | 0.593 | 0.36        | 1.0190     | 3.55               | 0.1215     | 1.52               | 0.43 | 713.4                  | 18.3                | 739.3                  | 10.6                |
| JAK-5/24              | 1699.8     | 0.221 | 0.02        | 7.6727     | 1.78               | 0.3749     | 1.56               | 0.88 | 2193.4                 | 16.1                | 2052.3                 | 27.5                |
| JAK-5/1.1             | 283.5      | 0.372 | 0.46        | 0.2740     | 6.80               | 0.0386     | 2.60               | 0.38 | 260                    | 140                 | 244.1                  | 6.2                 |
| JAK-5/2.1             | 331.8      | 0.516 | 0.00        | 0.6780     | 3.80               | 0.0824     | 2.40               | 0.65 | 593                    | 62                  | 511.0                  | 12.0                |
| JAK-5/2.2             | 795.8      | 0.020 | 0.75        | 0.4060     | 5.20               | 0.0567     | 2.40               | 0.46 | 279                    | 110                 | 355.8                  | 8.2                 |
| JAK-5/3.1             | 88.0       | 0.422 | 0.00        | 0.2740     | 6.60               | 0.0389     | 2.80               | 0.43 | 245                    | 140                 | 246.1                  | 6.9                 |
| JAK-5/4.1             | 358.4      | 0.468 | 0.25        | 0.8020     | 3.70               | 0.0973     | 2.40               | 0.66 | 596                    | 59                  | 599.0                  | 14.0                |
| JAK-5/5.1             | 244.5      | 0.418 | 0.00        | 0.2880     | 5.00               | 0.039      | 2.60               | 0.53 | 349                    | 95                  | 246.7                  | 6.4                 |
| JAK-5/6.1             | 130.8      | 0.474 | 0.00        | 0.2900     | 6.40               | 0.0379     | 2.90               | 0.46 | 430                    | 130                 | 239.8                  | 6.9                 |
| JAK-5/7.1             | 201.4      | 0.773 | 0.97        | 0.2760     | 9.00               | 0.0376     | 2.70               | 0.30 | 337                    | 190                 | 238.1                  | 6.3                 |
| JAK-5/8.1             | 398.3      | 0.297 | 0.32        | 0.2730     | 5.40               | 0.03952    | 2.50               | 0.46 | 201                    | 110                 | 249.8                  | 6.0                 |
| JAK-5/8.2             | 828.3      | 0.123 | 0.58        | 0.2870     | 4.90               | 0.04138    | 2.40               | 0.48 | 211                    | 100                 | 261.4                  | 6.1                 |
| JAK-5/9.1             | 280.5      | 0.376 | 0.67        | 0.2660     | 6.90               | 0.03848    | 2.50               | 0.37 | 203                    | 150                 | 243.4                  | 6.1                 |
| JAK-5/10.1            | 382.6      | 0.230 | 0.48        | 0.5670     | 5.40               | 0.0754     | 2.40               | 0.45 | 395                    | 110                 | 468.0                  | 11.0                |
| JAK-5/11.1            | 548.5      | 0.403 | 0.00        | 0.2716     | 3.40               | 0.03958    | 2.40               | 0.70 | 184                    | 56                  | 250.2                  | 5.9                 |
| JAK-5/12.1            | 327.7      | 0.285 | 0.83        | 0.2640     | 8.10               | 0.03953    | 2.50               | 0.31 | 117                    | 180                 | 249.9                  | 6.2                 |
| JAK-5/13.1            | 64.5       | 0.385 | 0.00        | 1.8100     | 6.10               | 0.1686     | 3.00               | 0.49 | 1143                   | 100                 | 1004.0                 | 28.0                |
