# Supplementary material
Source: MDPI journal article supplement (https://www.mdpi.com/2075-163X/9/11/652)
Supplement: s1 [file s1]

**Table S1:** Representative analyses of amphibole, white mica and garnet from Jaklovce, Dobšíná and Hačava.

| Sample:<br>Anal.No<br>Mineral:<br>Wt. % | DO-31a<br>7<br>Amp | DO-31a<br>9<br>Amp | DO-31b<br>6<br>Amp | DO-31b<br>13<br>Amp | DO-31a<br>5<br>Amp | DO-31b<br>2<br>Amp | DO-31b<br>3<br>Amp | DO-31b<br>9<br>Amp | DO-31b<br>10<br>Amp | BRT-1b<br>11<br>Amp | BRT-1b<br>16<br>Amp | BRT-1b<br>19<br>Amp | BRT-2<br>1<br>Amp | BRT-5<br>1<br>Amp |
|-----------------------------------------|--------------------|--------------------|--------------------|---------------------|--------------------|--------------------|--------------------|--------------------|---------------------|---------------------|---------------------|---------------------|-------------------|-------------------|
| SiO <sub>2</sub>                        | 55.68              | 59.02              | 57.16              | 57.39               | 55.25              | 57.12              | 55.94              | 57.40              | 56.14               | 49.20               | 44.28               | 45.31               | 44.21             | 53.76             |
| TiO <sub>2</sub>                        | 0.02               | 0.09               | 0.66               | 0.04                | 0.05               | 0.04               | 0.10               | 0.05               |                     | 0.09                | 0.55                | 0.32                | 0.58              | 0.00              |
| Al <sub>2</sub> O <sub>3</sub>          | 2.04               | 5.57               | 5.06               | 2.18                | 0.47               | 0.65               | 2.80               | 0.47               | 2.33                | 4.93                | 9.66                | 8.82                | 10.71             | 0.22              |
| Cr <sub>2</sub> O <sub>3</sub>          |                    | 0.04               |                    | 0.02                |                    | 0.02               |                    | 0.03               |                     | 0.00                | 0.01                | 0.03                | 0.02              | 0.03              |
| FeO                                     | 20.28              | 12.76              | 15.80              | 15.22               | 14.35              | 10.65              | 15.76              | 8.19               | 12.36               | 18.61               | 14.71               | 15.24               | 16.12             | 16.76             |
| MnO                                     | 0.09               | 0.02               | 0.07               | 0.12                | 0.32               | 0.03               | 0.10               | 0.05               | 0.10                | 0.26                | 0.30                | 0.43                | 0.24              | 0.35              |
| MgO                                     | 10.51              | 13.18              | 11.27              | 14.11               | 14.81              | 17.47              | 13.28              | 19.39              | 16.01               | 10.87               | 12.49               | 12.26               | 10.92             | 12.72             |
| NiO                                     | 0.02               |                    | 0.05               | 0.01                | 0.04               | 0.03               |                    |                    | 0.02                |                     |                     |                     |                   |                   |
| CaO                                     | 1.57               | 1.43               | 0.61               | 2.51                | 11.57              | 8.67               | 4.09               | 11.88              | 6.25                | 12.25               | 11.81               | 11.78               | 12.03             | 12.66             |
| Na <sub>2</sub> O                       | 6.21               | 6.58               | 7.09               | 5.98                | 0.96               | 2.25               | 4.99               | 0.78               | 4.18                | 0.41                | 1.01                | 0.99                | 0.88              | 0.05              |
| K <sub>2</sub> O                        | 0.03               | 0.04               | 0.03               | 0.04                | 0.07               | 0.10               | 0.08               | 0.08               | 0.10                | 0.12                | 0.83                | 0.80                | 0.72              | 0.00              |
| F                                       | 0.00               | 0.00               | 0.00               | 0.00                | 0.00               | 0.00               | 0.00               | 0.00               | 0.00                | 0.00                | 0.00                | 0.00                | 0.39              | 0.00              |
| Cl                                      | 0.00               | 0.00               | 0.00               | 0.00                | 0.00               | 0.00               | 0.00               | 0.00               | 0.00                | 0.00                | 0.03                | 0.01                | 0.00              | 0.01              |
| Total                                   | 96.45              | 98.73              | 97.80              | 97.62               | 97.89              | 97.03              | 97.17              | 98.32              | 97.49               | 96.74               | 95.68               | 96.00               | 96.81             | 96.54             |
| Si <sup>4+</sup>                        | 7.970              | 7.991              | 7.927              | 7.947               | 7.961              | 7.990              | 7.870              | 7.954              | 7.831               | 7.400               | 6.703               | 6.843               | 6.670             | 7.984             |
| Ti <sup>4+</sup>                        | 0.002              | 0.009              | 0.069              | 0.004               | 0.005              | 0.004              | 0.011              | 0.005              | 0.000               |                     |                     |                     |                   |                   |
| Al <sup>3+</sup>                        | 0.344              | 0.889              | 0.827              | 0.356               | 0.080              | 0.107              | 0.464              | 0.077              | 0.383               | 0.874               | 1.724               | 1.570               | 1.906             | 0.038             |
| Cr <sup>3+</sup>                        | 0.000              | 0.004              | 0.000              | 0.002               | 0.000              | 0.002              | 0.000              | 0.003              | 0.000               | 0.010               | 0.062               | 0.037               | 0.065             | 0.000             |
| Fe <sup>3+</sup>                        | 1.501              | 0.958              | 1.087              | 1.382               | 0.135              | 0.675              | 1.166              | 0.250              | 0.937               |                     |                     |                     |                   |                   |
| Fe <sup>2+</sup>                        | 0.927              | 0.486              | 0.745              | 0.381               | 1.594              | 0.571              | 0.689              | 0.699              | 0.505               | 2.342               | 1.862               | 1.924               | 2.034             | 2.081             |
| Mg <sup>2+</sup>                        | 2.243              | 2.660              | 2.330              | 2.913               | 3.181              | 3.643              | 2.785              | 4.006              | 3.329               | 2.437               | 2.819               | 2.760               | 2.455             | 2.816             |
| Mn <sup>2+</sup>                        | 0.011              | 0.002              | 0.008              | 0.014               | 0.039              | 0.004              | 0.012              | 0.006              | 0.012               |                     |                     |                     |                   | 0.043             |
| Ca <sup>2+</sup>                        | 0.241              | 0.207              | 0.091              | 0.372               | 1.786              | 1.299              | 0.617              | 1.764              | 0.934               | 1.973               | 1.916               | 1.906               | 1.946             | 2.015             |
| Ni <sup>2+</sup>                        | 0.002              | 0.000              | 0.006              | 0.001               | 0.005              | 0.004              | 0.004              | 0.000              | 0.002               |                     |                     |                     |                   |                   |
| Na <sup>+</sup>                         | 1.723              | 1.727              | 1.906              | 1.606               | 0.268              | 0.610              | 1.361              | 0.210              | 1.131               | 0.118               | 0.295               | 0.290               | 0.259             | 0.014             |
| K <sup>+</sup>                          | 0.005              | 0.007              | 0.005              | 0.007               | 0.013              | 0.018              | 0.014              | 0.014              | 0.018               | 0.023               | 0.159               | 0.155               | 0.139             | 0.000             |
| Total                                   | 14.970             | 14.942             | 15.002             | 14.985              | 15.067             | 14.928             | 14.992             | 14.988             | 15.083              | 15.177              | 15.540              | 15.485              | 15.474            | 14.991            |
| F <sup>-</sup>                          | 0.000              | 0.000              | 0.000              | 0.000               | 0.000              | 0.000              | 0.000              | 0.000              | 0.000               | 0.000               | 0.000               | 0.000               | 0.000             | 0.000             |
| Cl <sup>-</sup>                         | 0.000              | 0.000              | 0.000              | 0.000               | 0.000              | 0.000              | 0.000              | 0.000              | 0.000               | 0.000               | 0.000               | 0.000               | 0.000             | 0.000             |
| OH <sup>-</sup>                         | 2.000              | 2.000              | 2.000              | 2.000               | 2.000              | 2.000              | 2.000              | 2.000              | 2.000               | 2.000               | 2.000               | 2.000               | 2.000             | 2.000             |

[illegible]

| Sample:                        | JAK-30 | JAK-30 | DO-K2  | DO-K2  | DO-K2  | DO-K3  | DO-K3  | HAC-1  | HAC-1  |
|--------------------------------|--------|--------|--------|--------|--------|--------|--------|--------|--------|
| Anal.No                        | 4      | 5      | 2      | 3      | 4      | 3      | 4      | 4      | 5      |
| Mineral:                       | Cel-Ms |
| Wt. %                          |        |        |        |        |        |        |        |        |        |
| SiO <sub>2</sub>               | 54.55  | 55.74  | 52.22  | 57.29  | 55.29  | 54.79  | 52.33  | 50.54  | 51.61  |
| TiO <sub>2</sub>               | 0.00   | 0.00   | 0.13   | 0.00   | 0.06   | 0.07   | 0.24   | 0.08   | 0.16   |
| Al <sub>2</sub> O <sub>3</sub> | 24.04  | 22.18  | 24.04  | 24.00  | 24.32  | 25.41  | 27.21  | 25.20  | 23.37  |
| Cr <sub>2</sub> O <sub>3</sub> | 0.00   | 0.00   | 0.01   | 0.00   | 0.00   | 0.00   | 0.00   | 0.00   | 0.00   |
| FeO                            | 3.31   | 3.31   | 5.32   | 2.63   | 4.86   | 3.31   | 3.41   | 5.81   | 6.01   |
| MnO                            | 0.12   | 0.05   | 0.02   | 0.02   | 0.03   | 0.05   | 0.00   | 0.03   | 0.03   |
| MgO                            | 3.30   | 4.52   | 6.18   | 5.22   | 5.65   | 3.92   | 3.16   | 2.78   | 3.11   |
| CaO                            | 0.46   | 0.29   | 0.09   | 0.04   | 0.12   | 0.07   | 0.02   | 0.05   | 0.02   |
| Na <sub>2</sub> O              | 0.03   | 0.03   | 0.08   | 0.05   | 0.04   | 0.07   | 0.11   | 0.19   | 0.09   |
| K <sub>2</sub> O               | 10.76  | 10.66  | 9.15   | 9.39   | 8.24   | 10.31  | 11.26  | 10.05  | 10.86  |
| Total                          | 96.56  | 96.78  | 97.24  | 98.63  | 98.61  | 98.00  | 97.73  | 94.73  | 95.26  |
| Si <sup>4+</sup>               | 3.611  | 3.664  | 3.446  | 3.642  | 3.574  | 3.569  | 3.450  | 3.444  | 3.515  |
| IVAl <sup>3+</sup>             | 0.389  | 0.336  | 0.554  | 0.358  | 0.426  | 0.431  | 0.550  | 0.556  | 0.485  |
| ΣT                             | 4.000  | 4.000  | 4.000  | 4.000  | 4.000  | 4.000  | 4.000  | 4.000  | 4.000  |
| Ti <sup>4+</sup>               | 0.000  | 0.000  | 0.007  | 0.000  | 0.003  | 0.003  | 0.012  | 0.004  | 0.008  |
| VIAl <sup>3+</sup>             | 1.486  | 1.382  | 1.316  | 1.439  | 1.426  | 1.520  | 1.563  | 1.468  | 1.392  |
| Fe <sup>2+</sup>               | 0.183  | 0.182  | 0.293  | 0.140  | 0.263  | 0.180  | 0.188  | 0.331  | 0.342  |
| Mn <sup>2+</sup>               | 0.007  | 0.003  | 0.001  | 0.001  | 0.002  | 0.002  | 0.000  | 0.002  | 0.002  |
| Cr <sup>2+</sup>               | 0.001  | 0.001  | 0.003  | 0.000  | 0.000  | 0.000  | 0.001  | 0.000  | 0.000  |
| Mg <sup>2+</sup>               | 0.326  | 0.443  | 0.608  | 0.494  | 0.545  | 0.381  | 0.311  | 0.282  | 0.316  |
| ΣM                             | 2.002  | 2.011  | 2.227  | 2.074  | 2.238  | 2.087  | 2.075  | 2.087  | 2.059  |
| Ca <sup>2+</sup>               | 0.032  | 0.020  | 0.007  | 0.003  | 0.008  | 0.005  | 0.001  | 0.004  | 0.002  |
| Na <sup>+</sup>                | 0.003  | 0.00   | 0.01   | 0.01   | 0.00   | 0.01   | 0.01   | 0.03   | 0.01   |
| K <sup>+</sup>                 | 0.909  | 0.89   | 0.77   | 0.76   | 0.68   | 0.86   | 0.95   | 0.87   | 0.94   |
| □                              | 0.055  | 0.08   | 0.21   | 0.23   | 0.31   | 0.13   | 0.04   | 0.10   | 0.04   |
| ΣI                             | 1.000  | 1.00   | 1.00   | 1.00   | 1.00   | 1.00   | 1.00   | 1.00   | 1.00   |
| OH <sup>-</sup>                | 2.000  | 2.000  | 2.000  | 2.000  | 2.000  | 2.000  | 2.00   | 2.000  | 2.00   |

| Sample:                        | HAC-1  | HAC-1  | HAC-1  | HAC-1  | HAC-1  |
|--------------------------------|--------|--------|--------|--------|--------|
| Anal.No                        | 2      | 3      | 7      | 20     | 27     |
| Mineral:                       | Grt    | Grt    | Grt    | Grt    | Grt    |
| Wt. %                          |        |        |        |        |        |
| SiO <sub>2</sub>               | 37.53  | 37.17  | 37.04  | 37.37  | 37.51  |
| TiO <sub>2</sub>               | 0.07   | 0.13   | 0.17   | 0.20   | 0.11   |
| Al <sub>2</sub> O <sub>3</sub> | 20.52  | 20.23  | 20.17  | 20.04  | 20.59  |
| Cr <sub>2</sub> O <sub>3</sub> | 0.00   | 0.01   | 0.02   | 0.00   | 0.01   |
| FeO                            | 24.14  | 20.95  | 19.51  | 19.40  | 23.50  |
| V <sub>2</sub> O <sub>3</sub>  |        |        |        |        |        |
| MnO                            | 9.31   | 14.34  | 16.13  | 16.39  | 10.37  |
| MgO                            | 0.36   | 0.21   | 0.22   | 0.16   | 0.28   |
| CaO                            | 9.52   | 8.05   | 8.03   | 8.02   | 9.11   |
| Na <sub>2</sub> O              | 0.05   | 0.00   | 0.01   | 0.00   | 0.02   |
| Total                          | 101.50 | 101.09 | 101.29 | 101.60 | 101.49 |
| Si <sup>4+</sup>               | 2.982  | 2.98   | 2.97   | 2.99   | 2.985  |
| Ti <sup>4+</sup>               | 0.004  | 0.008  | 0.010  | 0.012  | 0.006  |
| Al <sup>3+</sup>               | 1.922  | 1.913  | 1.904  | 1.888  | 1.931  |
| Cr <sup>3+</sup>               | 0.000  | 0.001  | 0.001  | 0.000  | 0.001  |
| V                              | 0.000  | 0.000  | 0.000  | 0.000  | 0.000  |
| Fe <sup>3+</sup>               | 0.112  | 0.108  | 0.144  | 0.115  | 0.088  |
| Fe <sup>2+</sup>               | 1.493  | 1.298  | 1.163  | 1.182  | 1.476  |
| Mg <sup>2+</sup>               | 0.043  | 0.025  | 0.027  | 0.020  | 0.033  |
| Mn <sup>2+</sup>               | 0.627  | 0.975  | 1.094  | 1.109  | 0.699  |
| Mn <sup>3+</sup>               | 0.000  | 0.000  | 0.000  | 0.000  | 0.000  |
| Ca <sup>2+</sup>               | 0.810  | 0.692  | 0.689  | 0.687  | 0.777  |
| Na <sup>+</sup>                | 0.007  | 0.000  | 0.002  | 0.001  | 0.003  |
| Total                          | 8.000  | 8.000  | 8.000  | 8.000  | 8.000  |
| mol                            |        |        |        |        |        |
| Alm                            | 52.26  | 45.68  | 41.47  | 42.02  | 51.37  |
| Prp                            | 1.49   | 0.87   | 0.94   | 0.69   | 1.16   |
| Sps                            | 21.94  | 34.29  | 39.02  | 39.45  | 24.33  |
| Grs                            | 24.31  | 19.16  | 18.58  | 17.84  | 23.14  |
