# Supplementary material
Source: MDPI journal article supplement (https://www.mdpi.com/2075-163X/9/11/652)
Supplement: s1 [file s1]

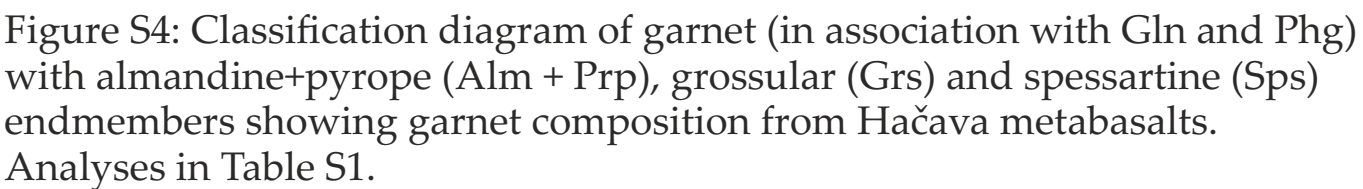

Figure S4: Classification diagram of garnet (in association with Gln and Phg) with almandine+pyrope (Alm + Prp), grossular (Grs) and spessartine (Sps) endmembers showing garnet composition from Hačava metabasalts. Analyses in Table S1.
