# Supplementary material
Source: MDPI journal article supplement (https://www.mdpi.com/2075-163X/9/11/652)
Supplement: s1 [file s1]

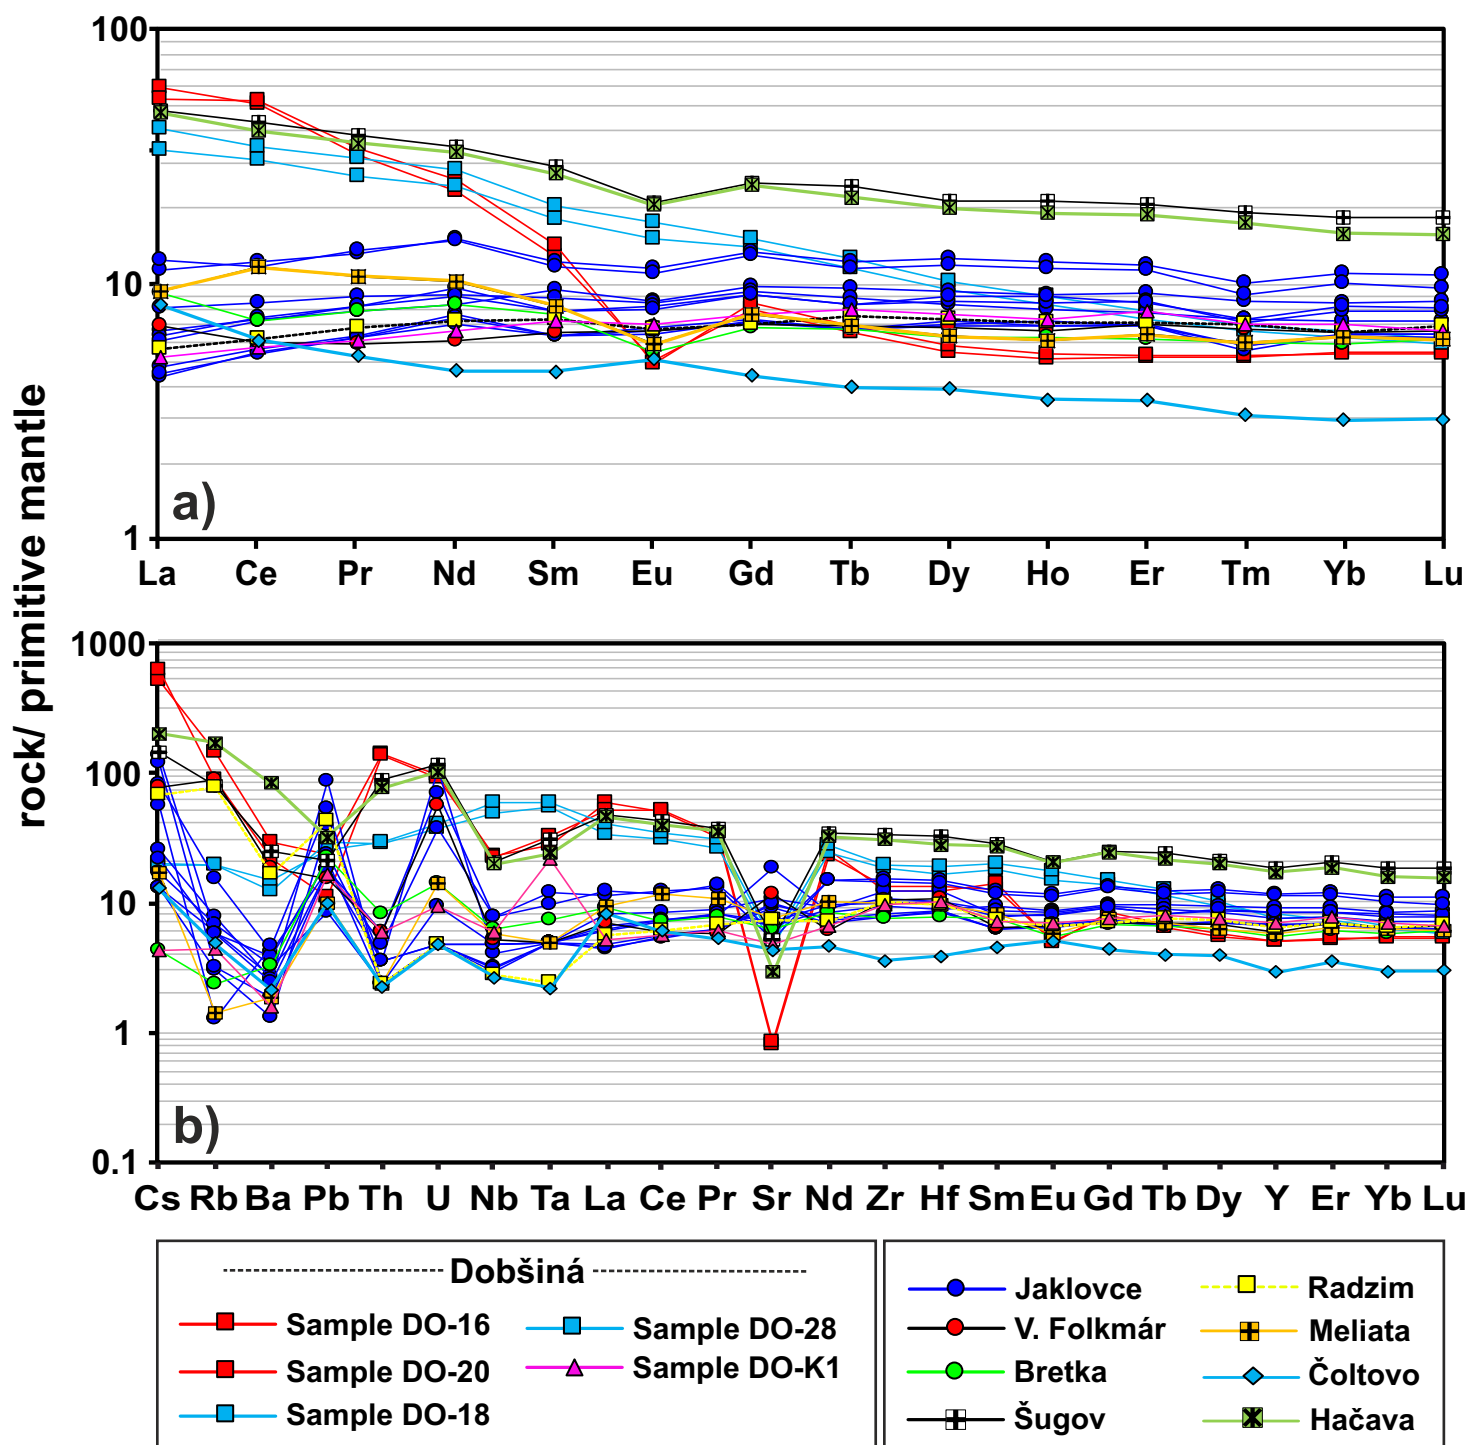

Figure S3: REE element (a) and Multi-element (b) Primitive mantle normalized patterns of Meliatic metabasalts. Normalizing values are from [116].
